# Supplementary material for: Pseudomonas aeruginosa-mannose-sensitive hemagglutinin inhibits pancreatic cancer cell proliferation and induces apoptosis via the EGFR pathway and caspase signaling
Source: PubMed Central journal article supplement (PMC5363631; doi:10.18632/oncotarget.12844), 2016-10-24
Supplement: oncotarget-07-77916-s001.pdf [file oncotarget-07-77916-s001.pdf]

# ***Pseudomonas aeruginosa*-mannose-sensitive hemagglutinin inhibits pancreatic cancer cell proliferation and induces apoptosis via the EGFR pathway and caspase signaling**

## **SUPPLEMENTARY FIGURE**

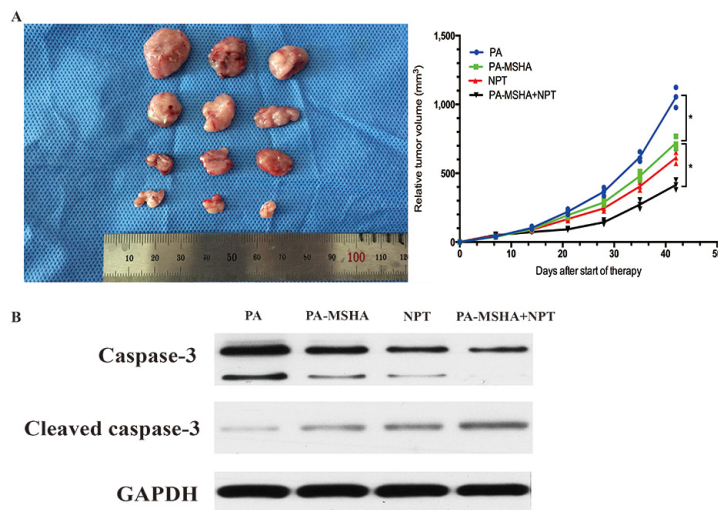

**Supplementary Figure 1: Synergistic Inhibitive effect on tumor growth in vivo by PA-MSHA and NPT.** **A.** Tumor volume measured at the indicated time-points. Treatment was initiated 10 days after implantation of pancreatic cancer cells into the mammary fat pads of mice. The mice were injected with PA, PA-MSHA, NPT and PA-MSHA plus NPT for 7 weeks and the tumor volumes measured. \*p < 0.01. **B.** Caspase-3 and cleaved caspase-3 expression in xenograft mice treated with PA, PA-MSHA, NPT and PA-MSHA plus NPT.
